# Supplementary material
Source: PubMed Central journal article supplement (PMC8088506)
Supplement: JB.00580-20-s0001.pdf [file JB.00580-20-s0001.pdf]

**Table S1. Primers used in this study.**

| <b>Primer</b> | <b>5'-3' sequence</b>                                                                    |
|---------------|------------------------------------------------------------------------------------------|
| OAS28         | CCGCGGGAAGAAATTTTTAGAGGAGTGATTTAATCTAAATATTAA<br>AATTAAATATTTATAGGAGG                    |
| OAS29         | GGAACCAATTATAGGATATAGAGATGGTAGTGGTCATCATCATCAT<br>CATCATTAAAATCTTATAGTATAAACTTCTG        |
| OAS30         | CAGAAGTTTATACTATAAGATTTTAATGATGATGATGATGATGAC<br>CACTACCATCTCTATATCCTATAATTGGTTCC        |
| OAS31         | GGATCCGCTATTACTATGTGAATAGTCTTTCCTTTATTTGAGATTA<br>AGAAAACAAAG                            |
| OAS32         | CCGCGGGAATTTAATTCTAAGTATATAAAATACTAAAGGAGGGT<br>TAA GAAGAATAAAATTTGAAAGG                 |
| OAS36         | GGATCCCCTTTCAAATTTTATTCTTCTTAACCCTCCTTTAGTATTTT<br>ATATAC                                |
| OAS50         | GGATCCTTAATGATGATGATGATGATGATTATTATTCAATTTATTT<br>TTTATGTCTTCAACATCACTTTTTATAATTGG       |
| OAS55         | GGATCCTTACTTGTCGTCATCGTCTTTGTAGTCATTATTATTCAAT<br>TTATTTTTTATGTCTTCAACATCACTTTTTATAATTGG |
| OAS37F        | GGGATT TATTTAGATGTAGATGTGCTTCCTGG                                                        |
| OAS38F        | CAAGGTGATAAAGTAAGTTATGAGGCTGC                                                            |
| OAS39F        | CAGGAGAATTTAGGGTTGTAAGAGAAAATAGTAGG                                                      |
| OAS40F        | GATTTTTCAATTAAAGGTATGATGCTACCTAATGG                                                      |
| OAS41F        | TTGAAAGGAATTTGGAATACATCAGTTAATAATTCAG                                                    |
| OAS42R        | CCAGGAAGCACATCTACATCTAAATAAATCCC                                                         |
| OAS43R        | GCAGCCTCATAACTTACTTTATCACCTTG                                                            |
| OAS44R        | CCTACTATTTTCTCTTACAACCCTAAATTCTCCTG                                                      |
| OAS45R        | CCATTAGGTAGCATCATACCTTTAATTGAAAAATC                                                      |
| OAS46R        | CTGAATTATTAAGTATGATTCCAAATTCCTTTCAA                                                      |
| OAS47R        | GATATATTATTTATCATTCCCTCCAACCCAAACAAAATG                                                  |
| OAS48F        | GGGAAATTAATTAATTATTCTAGACAGCACG                                                          |

OAS49R GTAGAGCTCTTTCAATGACTTTTATTGTGATAC  
OAS57R GTCGACTAATTATTATTCAATTTATTTTTTATGTCTTCAACATCAC  
OAS59F GAAGACATAAAAAATAAATTGAATAATAATTAGTCGACAAAAAA  
TTTATAAAAAATATAAATTTTAAATTTTTATTACAAAATTTAA  
OAS60R GTCGACTTATATGTCTTCAACATCACTTTTTATAAATTGGTAGTAAT  
TCTG  
OAS64R GTCGACTTAATTATTATTCAATTTATTTTTTCTTTTGCTATTTTCTT  
TTAATAC  
OAS62R GTCGACTTAATGATGATGATGATGATGATTATTATTCAATTTATTT  
TTTATGTCTTCAACATCACTTTTTATAAATTGG  
OAS63 GTCGACTTACTTGTTCATCGTCTTTGTAGTCATTATTATTCAATTTAT  
TTTTTATGTCTTCAACATCACTTTTTATAAATTGG  
OAS61R GGATCCTTAATGATGATGATGATGATGTAATGATTTATTAGTATA  
TTTTTCTACTAGCTTTTTTATATTCTATTTGTGATTTAAC  
OAS65R GGATCCTTAATGATGATGATGATGATGTTTTTTATCTAGACTATTT  
CTAAAAGTTATCAACTCCATAATTTTTTAGC  
OAS66R GGATCCTTAATGATGATGATGATGATGTATATTAAGAATCCAATT  
ATCTTCTTTAGTCCCATTAATAAATTTTTTATTG  
OAS67F GGAGGTTAATTGTGGATTCAGAACTG  
OAS68R TATACTTAGAATTAATTTCTTATACATTATATAAAGAGTTC

---

## Supplemental Material Methods

**Total counts, viable counts, and LDH activity assessments.** Aliquots from three, biologically independent protein expression assays, four hour post-induction with 30 mM lactose, were assayed as follows. Supernatant fractions leftover from the SDS-PAGE preparations were placed on ice for LDH assays. One ml quartz cuvettes 5 mM pyruvate, 0.2 mM NADH, 70 mM sodium phosphate pH 7.0, and 100  $\mu$ L culture supernatant were prepared. Absorbance was read at 340 nm over ten minutes relative to a blank prepared similarly but with 100  $\mu$ L water instead of pyruvate. For the empty vector lysed control sample, 40  $\mu$ L of cell-free extract, made by shaking with 0.1 mm zircon beads, was mixed with supernatants from pKRAH1, pAS11 and pAS12 from a single experiment for three replicates. Cell lysis was inferred as LDH activity, since LDH is an intracellular enzyme and is not secreted. LDH activity was measured as a loss in NADH absorbance at 340 nm over time. For viable cell estimates, cell culture were serially diluted in aerobic Dulbecco's phosphate buffered saline and spread onto BHI agar. These agar plates were immediately transferred to anaerobic conditions and incubated overnight at 37°C. The colonies on these agar plates were enumerated and CFU/mL were estimated from the total dilutions. For total count assessments, 10  $\mu$ L of 1:100 dilutions were placed in hemocytometer or Petroff-Hauser cell counting chambers. The cells were allowed to settle for a few minutes before enumeration.
